# Supplementary material for: Processing time affects sequential memory performance beginning at the level of visual encoding
Source: PubMed Central journal article supplement (PMC8942227; doi:10.1371/journal.pone.0265719), 2022-03-23
Supplement: pone.0265719.s001.pdf [file pone.0265719.s001.pdf]

| Sub | Slow   |        |        |        |        |        |        | Fast   |        |        |        |        |        |        |
|-----|--------|--------|--------|--------|--------|--------|--------|--------|--------|--------|--------|--------|--------|--------|
|     | 1      | 2      | 3      | 4      | 5      | 6      | 7      | 1      | 2      | 3      | 4      | 5      | 6      | 7      |
| U01 | 0.875  | 0.6875 | 0.8125 | 0.5625 | 0.5625 | 0.6875 | 0.8125 | 0.75   | 0.8125 | 0.75   | 0.8125 | 0.5625 | 0.5625 | 0.875  |
| U02 | 0.3125 | 0.5625 | 0.25   | 0.4375 | 0.5    | 0.8125 | 0.875  | 0.625  | 0.125  | 0.3125 | 0.5625 | 0.625  | 0.75   | 1      |
| U03 | 0.9375 | 0.8125 | 0.875  | 0.6875 | 0.875  | 0.6875 | 0.9375 | 0.6875 | 0.625  | 0.5    | 0.4375 | 0.5625 | 0.9375 | 0.9375 |
| U04 | 0.8125 | 0.875  | 0.875  | 0.75   | 0.75   | 0.5625 | 0.625  | 0.875  | 0.8125 | 0.875  | 0.6875 | 0.5    | 0.5    | 0.75   |
| U05 | 0.8125 | 0.75   | 0.75   | 0.6875 | 0.875  | 0.8125 | 0.8125 | 0.5625 | 0.625  | 0.25   | 0.6875 | 0.625  | 0.9375 | 0.875  |
| U06 | 0.875  | 0.9375 | 0.9375 | 0.625  | 0.625  | 0.5    | 0.875  | 0.8125 | 0.9375 | 0.875  | 0.625  | 0.4375 | 0.4375 | 0.8125 |
| U07 | 0.6875 | 0.75   | 0.75   | 0.625  | 0.5625 | 0.8125 | 0.875  | 0.875  | 0.875  | 0.6875 | 0.4375 | 0.5    | 0.6875 | 0.625  |
| U08 | 0.75   | 0.75   | 0.5625 | 0.75   | 0.625  | 0.8125 | 0.8125 | 0.8125 | 0.6875 | 0.6875 | 0.6875 | 0.625  | 0.5    | 0.5    |
| U09 | 0.9375 | 0.6875 | 0.5625 | 0.9375 | 0.9375 | 0.75   | 1      | 0.8125 | 0.8125 | 0.375  | 0.625  | 0.9375 | 0.75   | 0.875  |
| U10 | 0.625  | 0.5    | 0.5    | 0.5    | 0.4375 | 0.5625 | 0.9375 | 0.6875 | 0.5625 | 0.3125 | 0.25   | 0.25   | 0.6875 | 0.75   |
| U11 | 0.8125 | 0.875  | 0.8125 | 0.8125 | 0.8125 | 0.75   | 0.8125 | 0.9375 | 0.9375 | 0.75   | 0.6875 | 0.375  | 0.375  | 0.8125 |
| U12 | 0.9375 | 0.875  | 0.8125 | 0.625  | 0.5625 | 0.6875 | 0.75   | 0.875  | 0.875  | 0.6875 | 0.75   | 0.5625 | 0.375  | 0.625  |
| U13 | 1      | 0.75   | 1      | 0.875  | 0.6875 | 0.875  | 0.9375 | 0.75   | 0.625  | 0.75   | 0.6875 | 0.4375 | 0.6875 | 0.9375 |
| U14 | 0.6875 | 0.75   | 0.75   | 0.4375 | 0.75   | 0.8125 | 1      | 0.625  | 0.75   | 0.5    | 0.4375 | 0.625  | 0.8125 | 0.875  |
| U15 | 0.9375 | 0.8125 | 0.9375 | 0.8125 | 0.75   | 0.6875 | 0.6875 | 0.8125 | 1      | 0.5625 | 0.5    | 0.3125 | 0.3125 | 0.8125 |
| U16 | 0.625  | 0.75   | 0.8125 | 0.5625 | 0.8125 | 0.9375 | 1      | 1      | 0.75   | 0.5    | 0.6875 | 0.5625 | 0.875  | 0.8125 |
| U17 | 1      | 0.8125 | 1      | 0.875  | 0.875  | 1      | 0.875  | 0.75   | 0.8125 | 0.8125 | 0.8125 | 0.75   | 0.8125 | 0.9375 |
| U18 | 0.9375 | 0.8125 | 0.875  | 0.75   | 0.5    | 0.5    | 0.6875 | 0.9375 | 0.9375 | 0.875  | 1      | 0.25   | 0.375  | 0.375  |
| U19 | 0.8125 | 0.9375 | 0.5625 | 0.6875 | 0.6875 | 0.875  | 0.9375 | 0.9375 | 0.5    | 0.5625 | 0.375  | 0.5    | 0.625  | 1      |
| U20 | 0.8125 | 0.75   | 0.5    | 0.5    | 0.4375 | 0.9375 | 1      | 0.8125 | 0.8125 | 0.5    | 0.4375 | 0.4375 | 0.625  | 0.75   |
| U21 | 0.75   | 0.6875 | 0.8125 | 0.4375 | 0.375  | 0.6875 | 0.875  | 0.75   | 0.375  | 0.25   | 0.25   | 0.5625 | 0.5    | 0.9375 |
| U22 | 0.875  | 0.8125 | 0.75   | 0.5625 | 0.5    | 0.8125 | 1      | 0.6875 | 0.9375 | 0.625  | 0.6875 | 0.8125 | 0.75   | 1      |
| U23 | 1      | 0.8125 | 0.875  | 0.8125 | 0.75   | 0.8125 | 0.8125 | 1      | 0.875  | 0.9375 | 0.625  | 0.625  | 0.375  | 0.6875 |
| U24 | 1      | 0.9375 | 0.8125 | 0.8125 | 1      | 0.875  | 0.8125 | 0.9375 | 0.875  | 0.75   | 0.6875 | 0.4375 | 0.875  | 0.9375 |
| U25 | 0.9375 | 0.8125 | 0.8125 | 0.875  | 0.375  | 0.75   | 0.75   | 0.875  | 0.6875 | 0.5625 | 0.6875 | 0.5    | 0.4375 | 0.75   |
| U26 | 0.5    | 0.5    | 0.5625 | 0.4375 | 0.3125 | 0.6875 | 0.9375 | 0.8125 | 0.5    | 0.375  | 0.25   | 0.375  | 0.5625 | 0.6875 |
| U27 | 0.625  | 0.5    | 0.375  | 0.1875 | 0.5    | 0.6875 | 0.75   | 0.625  | 0.25   | 0.25   | 0.4375 | 0.3125 | 0.625  | 0.625  |
| U28 | 0.6875 | 0.5625 | 0.6875 | 0.875  | 0.5    | 0.75   | 0.9375 | 0.6875 | 0.5    | 0.5    | 0.5    | 0.625  | 0.625  | 0.8125 |
| U29 | 0.8125 | 0.75   | 0.5    | 0.4375 | 0.625  | 0.5625 | 0.6875 | 1      | 0.875  | 0.6875 | 0.5625 | 0.4375 | 0.5625 | 0.6875 |
