# Supplementary material for: Processing time affects sequential memory performance beginning at the level of visual encoding
Source: PubMed Central journal article supplement (PMC8942227; doi:10.1371/journal.pone.0265719), 2022-03-23
Supplement: pone.0265719.s002.pdf [file pone.0265719.s002.pdf]

## SLOW

| Sub | Occipital (s) | Frontal (s) |
|-----|---------------|-------------|
| U01 | 0.25          | 0.23        |
| U02 | 0.28          | 0.3         |
| U03 | 0.36          | 0.44        |
| U04 | 0.03          | 0.33        |
| U05 | 0.2           | 0.33        |
| U06 | 0.17          | 0.35        |
| U07 | 0.34          | 0.44        |
| U08 | 0.3           | 0.22        |
| U09 | 0.29          | 0.38        |
| U10 | 0.22          | 0.13        |
| U11 | 0.25          | 0.23        |
| U12 | 0.13          | 0.17        |
| U13 | 0.27          | 0.3         |
| U14 | 0.11          | 0.45        |
| U15 | 0.23          | 0.41        |
| U16 | 0.29          | 0.29        |
| U17 | 0.25          | 0.44        |
| U18 | 0.23          | 0.33        |
| U19 | 0.21          | 0.32        |
| U20 | 0.24          | 0.12        |
| U21 | 0.22          | 0.29        |
| U22 | 0.15          | 0.21        |
| U23 | 0.23          | 0.25        |
| U24 | 0.36          | 0.18        |
| U25 | 0.33          | 0.23        |
| U26 | 0.24          | 0.46        |
| U27 | 0.21          | 0.43        |
| U28 | 0.39          | 0.19        |
| U29 | 0.37          | 0.33        |

## FAST

| Sub | Occipital (s) | Frontal (s) |
|-----|---------------|-------------|
| U01 | 0.3           | 0.26        |
| U02 | 0.35          | 0.35        |
| U03 | 0.46          | 0.52        |
| U04 | 0.04          | 0.35        |
| U05 | 0.24          | 0.37        |
| U06 | 0.15          | 0.35        |
| U07 | 0.42          | 0.5         |
| U08 | 0.37          | 0.34        |
| U09 | 0.27          | 0.39        |
| U10 | 0.27          | 0.18        |
| U11 | 0.31          | 0.32        |
| U12 | 0.19          | 0.21        |
| U13 | 0.36          | 0.35        |
| U14 | 0.1           | 0.41        |
| U15 | 0.3           | 0.39        |
| U16 | 0.34          | 0.3         |
| U17 | 0.21          | 0.4         |
| U18 | 0.22          | 0.39        |
| U19 | 0.27          | 0.33        |
| U20 | 0.31          | 0.22        |
| U21 | 0.32          | 0.33        |
| U22 | 0.23          | 0.27        |
| U23 | 0.22          | 0.29        |
| U24 | 0.38          | 0.22        |
| U25 | 0.4           | 0.24        |
| U26 | 0.37          | 0.39        |
| U27 | 0.31          | 0.38        |
| U28 | 0.49          | 0.24        |
| U29 | 0.43          | 0.37        |
