# Supplementary material for: Processing time affects sequential memory performance beginning at the level of visual encoding
Source: PubMed Central journal article supplement (PMC8942227; doi:10.1371/journal.pone.0265719), 2022-03-23
Supplement: pone.0265719.s003.pdf [file pone.0265719.s003.pdf]

| Sub | Slow ( $\times 10^{-2}$ ) |          |          |          | Fast ( $\times 10^{-2}$ ) |          |          |          |
|-----|---------------------------|----------|----------|----------|---------------------------|----------|----------|----------|
|     | Beg                       | Mid      | End      | Hld      | Beg                       | Mid      | End      | Hld      |
| U01 | -3.53389                  | -2.84246 | 1.04635  | -0.97681 | -0.08417                  | -5.27565 | -1.78085 | 3.253349 |
| U02 | -7.33589                  | -1.86599 | 0.351281 | -3.49881 | 0.224642                  | -0.39405 | 0.907867 | 2.931483 |
| U03 | -8.92179                  | -8.94294 | -5.81605 | -6.23584 | -1.47356                  | -4.7774  | -0.81297 | -7.59017 |
| U04 | -5.40238                  | -10.7074 | -4.51592 | -2.37357 | -2.05659                  | -6.26663 | -4.093   | -6.13912 |
| U05 | -0.61982                  | -1.42669 | 1.586938 | 3.980685 | 3.41357                   | 1.684065 | -1.4007  | 6.175979 |
| U06 | 6.866424                  | 6.993265 | 7.212319 | 6.54594  | -0.04608                  | -1.27182 | 0.074275 | 5.387694 |
| U07 | 1.653524                  | 6.771468 | 10.26198 | 26.31159 | 2.795595                  | 2.526303 | 3.879245 | 14.46096 |
| U08 | -3.95027                  | -16.9319 | -9.58168 | -6.35426 | -1.01307                  | -0.91475 | -0.5788  | 4.817964 |
| U09 | -1.68761                  | 1.082683 | -0.59413 | 10.5198  | 1.623003                  | 2.278646 | 1.306271 | 6.608753 |
| U10 | -0.22098                  | 5.233017 | 3.551134 | 6.773365 | 1.083365                  | 1.985294 | 0.903776 | 7.298303 |
| U11 | 3.734106                  | 9.364812 | 8.722501 | 3.791098 | 3.329095                  | -6.2688  | -4.32372 | -5.64644 |
| U12 | -2.10241                  | -3.12156 | -0.24337 | -0.06533 | 0.758152                  | 0.002462 | 0.224701 | 2.48427  |
| U13 | -6.11215                  | 0.421965 | 0.178382 | 1.18493  | 0.424202                  | 0.32546  | 1.47845  | 9.217778 |
| U14 | 11.10701                  | 18.55588 | 16.50572 | 10.93416 | -0.56512                  | -0.00068 | 0.392945 | 11.73822 |
| U15 | 0.123452                  | 2.160468 | 8.063097 | 2.465554 | 1.741892                  | 3.00009  | 1.525119 | 4.220029 |
| U16 | -2.75938                  | -6.71707 | -5.79191 | -0.56398 | -1.35879                  | -1.80667 | 0.359405 | 6.536165 |
| U17 | 2.759691                  | 6.513582 | 13.26181 | 11.7223  | 3.809843                  | -0.44811 | 1.552303 | 8.512749 |
| U18 | -2.50736                  | -7.21868 | -5.57878 | -4.16011 | 0.162598                  | 0.134863 | -1.17558 | -1.20263 |
| U19 | -1.68579                  | -2.91804 | -5.45007 | -1.05634 | 2.036018                  | 0.889743 | -1.26878 | -1.11803 |
| U20 | 5.316714                  | 12.69421 | 6.19432  | 9.926576 | 1.569089                  | 3.213967 | -1.36953 | 11.92415 |
| U21 | 3.185032                  | -0.07144 | 6.239693 | 14.69261 | -2.50828                  | -6.15053 | -3.8534  | 23.54645 |
| U22 | -1.20654                  | -3.54416 | -5.21823 | -1.72822 | -0.09517                  | -3.3653  | -2.44282 | -0.22186 |
| U23 | 10.36126                  | 14.71784 | 14.81066 | 8.779252 | -0.94198                  | 1.912303 | 5.086038 | 6.807678 |
| U24 | -9.48441                  | -17.6075 | -10.3918 | 0.414115 | -1.56315                  | -2.44344 | -3.0192  | 10.35868 |
| U25 | 2.27764                   | 29.56153 | 35.46847 | 30.52327 | 1.485388                  | 3.025469 | 2.364182 | 23.19994 |
| U26 | -1.41356                  | 2.011554 | 4.177446 | 22.19428 | -0.55996                  | 1.174636 | 2.289488 | 16.85965 |
| U27 | -14.3194                  | -23.3043 | -21.3881 | -10.6025 | -1.24339                  | -4.7399  | -4.76772 | -8.82817 |
| U28 | -0.51185                  | 11.17234 | 2.562104 | 7.828328 | -1.4376                   | -3.90182 | -0.64144 | 1.201483 |
| U29 | -3.46805                  | -3.57027 | 2.728997 | 0.480507 | 1.409641                  | 2.501151 | 2.972934 | 7.691217 |
