# Supplementary material for: Processing time affects sequential memory performance beginning at the level of visual encoding
Source: PubMed Central journal article supplement (PMC8942227; doi:10.1371/journal.pone.0265719), 2022-03-23
Supplement: pone.0265719.s004.pdf [file pone.0265719.s004.pdf]

| Sub | Slow ( $\times 10^{-2}$ ) |          |          |          | Fast ( $\times 10^{-2}$ ) |          |          |          |
|-----|---------------------------|----------|----------|----------|---------------------------|----------|----------|----------|
|     | Beg                       | Mid      | End      | Hld      | Beg                       | Mid      | End      | Hld      |
| U01 | -3.99221                  | -5.23824 | 2.913103 | -8.31538 | -0.6022                   | -4.87227 | -3.46277 | -1.97405 |
| U02 | 4.082824                  | 4.99097  | 2.012566 | -1.56539 | 3.959757                  | 1.298317 | 0.143    | -2.02865 |
| U03 | 1.449132                  | 0.536583 | -0.09115 | 0.998859 | 0.27606                   | 0.371758 | 0.242414 | -1.40234 |
| U04 | -2.02916                  | 6.555108 | 5.708038 | -6.73426 | 2.023082                  | -6.80768 | -4.89157 | -6.24036 |
| U05 | 1.255164                  | -2.36484 | 3.256757 | 2.761575 | 7.679198                  | 4.633901 | 1.589876 | 8.735029 |
| U06 | 5.55738                   | 3.444034 | 3.062842 | -0.26089 | 2.435377                  | -0.2877  | -1.2776  | -2.34673 |
| U07 | -1.96656                  | -2.03634 | -1.01609 | -0.69647 | 2.931856                  | 1.734639 | -0.12793 | -1.60301 |
| U08 | -4.24929                  | 9.806614 | 5.010605 | 11.19441 | 3.204884                  | 1.835747 | 0.956087 | 8.999636 |
| U09 | 2.874945                  | 0.483802 | -2.83658 | -1.42629 | 0.778725                  | -0.63681 | -2.05167 | -3.30304 |
| U10 | 7.620624                  | 18.51219 | 9.771333 | 2.138465 | 5.955186                  | 10.38954 | 6.219211 | 3.932864 |
| U11 | 11.28223                  | 21.1128  | 10.67998 | 3.877281 | 4.721026                  | 0.061878 | 2.259198 | 16.52204 |
| U12 | 6.103036                  | 2.08662  | 1.86842  | 3.071996 | 2.101958                  | -0.88018 | -1.53901 | -2.36016 |
| U13 | -3.51654                  | 3.35259  | 2.739197 | -3.93213 | 1.358814                  | -1.03572 | 0.131348 | 0.797139 |
| U14 | 5.483564                  | 6.479224 | 4.936388 | 3.116444 | 1.955824                  | 3.32895  | 2.882838 | 4.014077 |
| U15 | 7.919802                  | 10.19924 | 4.129451 | 0.709179 | 5.552882                  | 4.545074 | 1.753797 | 1.528055 |
| U16 | 8.807388                  | 16.17945 | 3.867955 | 1.195538 | 5.388266                  | 6.506892 | 3.577278 | 1.298226 |
| U17 | 7.548527                  | 9.229353 | 4.173221 | 0.778362 | 3.060696                  | 2.771174 | -0.07199 | 0.094869 |
| U18 | 4.701197                  | 2.006377 | 5.619204 | 1.979199 | 2.581731                  | 1.443103 | 2.093349 | 3.794464 |
| U19 | 7.616986                  | 4.585833 | 2.952966 | 1.726484 | 4.536161                  | 1.750656 | -0.01103 | -2.09113 |
| U20 | 5.381483                  | 5.837312 | 2.633634 | 2.249179 | 4.248717                  | 1.456328 | -1.09045 | 2.553644 |
| U21 | 11.78628                  | 16.94337 | 8.195005 | 6.152781 | 3.806971                  | 4.509585 | 6.227142 | 7.79252  |
| U22 | 5.211355                  | 4.005082 | -1.44836 | -3.97273 | 2.180456                  | -0.41516 | 1.085188 | -2.01525 |
| U23 | 6.279589                  | 7.675269 | 4.22852  | -1.02504 | 5.107404                  | 2.574324 | 1.526393 | -0.55452 |
| U24 | -2.40153                  | 5.3425   | -0.71265 | -0.16028 | 2.245609                  | 0.683498 | 0.872829 | 2.521161 |
| U25 | 2.031839                  | 5.411202 | 5.019304 | 0.645285 | 2.06812                   | 0.374952 | -0.32756 | 2.46844  |
| U26 | 4.506741                  | 5.392252 | 4.344267 | 7.313523 | 4.979892                  | 2.462342 | 1.335584 | 4.596745 |
| U27 | -0.72207                  | 1.416981 | -1.19677 | -1.22801 | 1.132405                  | -2.21638 | -1.65216 | -0.88622 |
| U28 | 4.617788                  | 7.463321 | -0.15913 | 0.957444 | 1.903806                  | 1.48041  | 1.067106 | 0.630431 |
| U29 | 2.450698                  | 1.57404  | 3.507683 | 3.844423 | 5.556048                  | 4.471861 | 2.385125 | 0.946393 |
